# Supplementary material for: Refining outcomes in technically resectable colorectal liver metastases: A simplified risk score and the role of preoperative chemotherapy
Source: Research Square preprint supplement (doi:10.21203/rs.3.rs-7764821/v1), 2025-10-23
Supplement: Supplementary file 1 [file 4617b8a2cd67dc1fe8e83880.docx]

S3. Analysis of risk factors associated with survival after liver resection for CRLM (n=115)

|  |  |  | Univariate | | | |  | Multivariate | | | |
| --- | --- | --- | --- | --- | --- | --- | --- | --- | --- | --- | --- |
|  |  | N (%) | HR | 95％CI | | P value |  | HR | 95％CI | | P value |
| Age (years-old) | < 65 | 44 (38.3) | 1 | － | － | － |  |  |  |  |  |
|  | **≥65** | 71 (61.7) | 1.59 | 0.83 | 3.22 | 0.166 |  |  |  |  |  |
| Gender | Male | 71 (61.7) | 1 | － | － | － |  |  |  |  |  |
|  | **Female** | 44 (38.3) | 1.25 | 0.65 | 2.38 | 0.494 |  |  |  |  |  |
| Primary site | Right | 38 (33.0) | 1 | － | － | － |  |  |  |  |  |
|  | **Left** | 77 (67.0) | 1.46 | 0.73 | 3.15 | 0.294 |  |  |  |  |  |
| Primary tumor T status | pT1-3 | 91 (79.8) | 1 | － | － | － |  |  |  |  |  |
|  | **pT4** | 23 (20.2) | 0.60 | 0.23 | 1.35 | 0.232 |  |  |  |  |  |
| Primary tumor LN status | Negative | 36 (32.1) | 1 | － | － | － |  |  |  |  |  |
|  | **Positive** | 76 (67.9) | 1.73 | 0.83 | 4.06 | 0.147 |  |  |  |  |  |
| ly (primary tumor) | Negative | 13 (12.0) | 1 | － | － | － |  |  |  |  |  |
|  | **Positive** | 95 (88.0) | 1.37 | 0.55 | 4.59 | 0.535 |  |  |  |  |  |
| v (primary tumor) | Negative | 27 (24.8) | 1 | － | － | － |  |  |  |  |  |
|  | **Positive** | 82 (75.2) | 0.73 | 0.37 | 1.54 | 0.397 |  |  |  |  |  |
| CEA level* | ≤ 5.0 ng/ml | 33 (25.2) | 1 | － | － | － |  | 1 | － | － | － |
|  | **> 5.0 ng/ml** | 98 (74.8) | 2.98 | 1.27 | 8.72 | **0.010** |  | 2.20 | 0.90 | 6.60 | 0.086 |
| CA19-9 level* | ≤ 37.0 U/ml | 78 (59.5) | 1 | － | － |  |  |  |  |  |  |
|  | **> 37.0 U/ml** | 53 (40.5) | 1.18 | 0.60 | 2.24 | 0.622 |  |  |  |  |  |
| Timing of diagnosis of CRLM** | Metachronous | 20 (17.4) | 1 | － | － | － |  |  |  |  |  |
|  | **Synchronous** | 95 (82.6) | 1.40 | 0.60 | 4.10 | 0.462 |  |  |  |  |  |
| Extrahepatic metastatic disease* | No | 101 (87.8) | 1 | － | － | － |  |  |  |  |  |
|  | **Yes** | 14 (12.2) | 1.14 | 0.39 | 2.68 | 0.786 |  |  |  |  |  |
| NLR*** | < 2.9 | 89 (77.4) | 1 | － | － | － |  | 1 | － | － | － |
|  | **≥2.9** | 26 (22.6) | 2.23 | 0.94 | 4.71 | 0.068 |  | 1.63 | 0.68 | 3.49 | 0.258 |
| Prognostic criteria | low risk | 69 (60.0) | 1 | － | － | － |  | 1 | － | － | － |
|  | **high risk** | 46 (40.0) | 2.72 | 1.43 | 5.33 | **0.002** |  | 2.24 | 1.16 | 4.47 | **0.017** |

Univariate and multivariate analyses were analyzed using the Cox proportional hazards model. In the multivariate analysis, factors were extracted based on p values less than 0.10. *at diagnosis of CRLM, **Synchronous: Liver metastases are present at the time of diagnosis of the primary tumor, or liver metastases appear within 1 year after resection of the primary tumor. Metachronous: Liver metastases appear more than 1 year after resection of the primary tumor, ***before liver resection. ly: lymphatic vascular invasion, v: venous invasion, CEA: carcinoembryonic antigen, CA19-9: carbohydrate antigen 19-9, NLR: neutrophil-lymphocyte ratio.
