# Supplementary material for: Refining outcomes in technically resectable colorectal liver metastases: A simplified risk score and the role of preoperative chemotherapy
Source: Research Square preprint supplement (doi:10.21203/rs.3.rs-7764821/v1), 2025-10-23
Supplement: Supplementary file 3 [file 8793a9ab44d30c5c0adcccd2.docx]

S2. Analysis of risk factors associated with recurrence after R0 resection for CRLM (n=115)

|  |  |  | Univariate | | | |  | Multivariate | | | |
| --- | --- | --- | --- | --- | --- | --- | --- | --- | --- | --- | --- |
|  |  | N (%) | HR | 95％CI | | P value |  | HR | 95％CI | | P value |
| Age (years-old) | < 65 | 44 (38.3) | 1 | － | － | － |  |  |  |  |  |
|  | **≥65** | 71 (61.7) | 1.10 | 0.69 | 1.78 | 0.701 |  |  |  |  |  |
| Gender | Male | 71 (61.7) | 1 | － | － | － |  |  |  |  |  |
|  | **Female** | 44 (38.3) | 1.07 | 0.66 | 1.71 | 0.768 |  |  |  |  |  |
| Primary site | Right | 38 (33.0) | 1 | － | － | － |  |  |  |  |  |
|  | **Left** | 77 (67.0) | 0.90 | 0.56 | 1.48 | 0.679 |  |  |  |  |  |
| Primary tumor T status | pT1-3 | 91 (79.8) | 1 | － | － | － |  |  |  |  |  |
|  | **pT4** | 23 (20.2) | 0.98 | 0.55 | 1.68 | 0.954 |  |  |  |  |  |
| Primary tumor LN status | Negative | 36 (32.1) | 1 | － | － | － |  |  |  |  |  |
|  | **Positive** | 76 (67.9) | 1.28 | 0.77 | 2.19 | 0.348 |  |  |  |  |  |
| ly (primary tumor) | Negative | 13 (12.0) | 1 | － | － | － |  | 1 | － | － | － |
|  | **Positive** | 95 (88.0) | 1.92 | 0.90 | 4.98 | 0.096 |  | 1.69 | 0.78 | 4.42 | 0.201 |
| v (primary tumor) | Negative | 27 (24.8) | 1 | － | － | － |  |  |  |  |  |
|  | **Positive** | 82 (75.2) | 0.89 | 0.53 | 1.59 | 0.683 |  |  |  |  |  |
| CEA level* | ≤ 5.0 ng/ml | 30 (26.1) | 1 | － | － | － |  | 1 | － | － | － |
|  | **> 5.0 ng/ml** | 85 (73.9) | 1.83 | 1.06 | 3.36 | **0.029** |  | 1.26 | 0.68 | 2.45 | 0.466 |
| CA19-9 level* | ≤ 37.0 U/ml | 76 (66.1) | 1 | － | － | － |  | 1 | － | － | － |
|  | **> 37.0 U/ml** | 39 (33.9) | 1.66 | 1.03 | 2.66 | **0.039** |  | 1.03 | 0.59 | 1.78 | 0.919 |
| Timing of diagnosis of CRLM** | Metachronous | 20 (17.4) | 1 | － | － | － |  |  |  |  |  |
|  | **Synchronous** | 95 (82.6) | 1.67 | 0.90 | 4.37 | 0.110 |  |  |  |  |  |
| Extrahepatic metastatic disease* | No | 101 (87.8) | 1 | － | － | － |  |  |  |  |  |
|  | **Yes** | 14 (12.2) | 1.29 | 0.62 | 2.40 | 0.472 |  |  |  |  |  |
| NLR*** | < 2.9 | 89 (77.4) | 1 | － | － | － |  | 1 | － | － | － |
|  | **≥2.9** | 26 (22.6) | 2.18 | 1.26 | 3.62 | **0.006** |  | 2.00 | 1.11 | 3.47 | **0.022** |
| Prognostic criteria | low risk | 69 (60.0) | 1 | － | － | － |  | 1 | － | － | － |
|  | **high risk** | 46 (40.0) | 2.56 | 1.59 | 4.12 | **< 0.001** |  | 2.05 | 1.22 | 3.45 | **0.007** |

Univariate and multivariate analyses were analyzed using the Cox proportional hazards model. In the multivariate analysis, factors were extracted based on p values less than 0.10. *at diagnosis of CRLM, **Synchronous: Liver metastases are present at the time of diagnosis of the primary tumor, or liver metastases appear within 1 year after resection of the primary tumor. Metachronous: Liver metastases appear more than 1 year after resection of the primary tumor, ***before liver resection. ly: lymphatic vascular invasion, v: venous invasion, CEA: carcinoembryonic antigen, CA19-9: carbohydrate antigen 19-9, NLR: neutrophil-lymphocyte ratio.
